# Supplementary material
Source: publisher figshare collection journal article supplement (https://gsapubs.figshare.com/articles/dataset/_/12533975)
Supplement: Supplementary file 1 [file 1]

## 1. SAMPLE DESCRIPTION

In order to obtain constraints on the redox state of the convecting mantle, a spreading ridge origin has to be ascertained for the samples to which the V/Sc redox proxy is applied (Foley, 2011). We rely on literature reports of regional tectonic evolution and on geochemical indicators (e.g. LREE-depleted REE patterns with flat MREE-HREE, depleted initial radiogenic isotope compositions, lack of Ti-Nb-Ta depletions) to find appropriate eclogite and ophiolite suites that may represent fragments of oceanic crust that was obducted (ophiolites) or exhumed (orogenic metabasalts) during the closure of past ocean basins, or emplaced during the amalgamation of cratons (mantle eclogites) (Table DR1). Only non-plume-, non-subduction-related orogenic eclogites, and ophiolites that are allochthonous to the continental rocks with which they now occur, can provide unambiguous constraints on conditions of melting of the ambient convecting mantle (Pearce, 2008; Kamber, 2015). This does not apply to “ophiolites” occurring in Archean greenstone belts, or to basalts associated with komatiites, which are (par)autochthonous and do not represent Archean oceanic crust (Bickle and Nisbet, 1994; Pearce, 2008; Kamber, 2015). The mantle eclogites used in this study fulfil the requirement of a low-pressure origin (Jacob, 2004; Aulbach and Viljoen, 2015) and have ages that often correlate with periods of craton amalgamation or collisions at craton margins (Table DR1).

## 2. METHODS

### Bulk rock reconstruction

In order to obtain kimberlite-free bulk mantle eclogite compositions, it is common practise to reconstruct these from mineral compositions weighted by their modal abundances (Jacob, 2004). The procedure and rationale has been outlined in detail in Aulbach and Viljoen (2015). The chosen mineral mode of 55% garnet plus 45% cpx is dictated by the picritic rather than basaltic nature of mantle eclogites (Jacob, 2004), lies within the range of measured modes and reproduces the major-element compositions of picrites produced in experiments at ~2 to 3 GPa and ~1400 to 1450° C (similar to the conditions determined for ambient Archean mantle from mantle eclogites from the Kaapvaal craton; Aulbach and Viljoen, 2015), with SiO<sub>2</sub> of ~46-48 wt% and MgO of 14-16 wt% (Falloon and Green, 1988; Hirose and Kushiro, 1993). Rutile does not control the concentrations of V and Sc in the residue (Aulbach et al., 2011), but its presence will have an effect on bulk rock V/Sc, increasing this ratio by 0.15 in eclogites from the Lace kimberlite, Kaapvaal craton (n = 3; Aulbach and Viljoen, 2015) and by 0.14 in eclogites from the central Slave Craton (n = 6; Aulbach et al., 2011). The average V/Sc of each eclogite xenolith suite in this study was therefore adjusted by +0.15 to account for the likely presence of rutile. In contrast, spinels, which also have high D<sub>V</sub> (Mallmann and O'Neill, 2009), are rarely reported for eclogite xenoliths and such samples are not included here.

## 40 Data filtering

41 Samples (including MORB) with chondrite-normalised Ce/Yb > 1 are possibly  
42 metasomatised (Aulbach and Viljoen, 2015) and are therefore filtered from the data-set.  
43 Assuming that true peridotite-derived melts emplaced in spreading ridges should have Ce/Yb  
44  $\leq 1$ , the Ce/Yb filter further removes samples having protoliths (1) derived from enriched  
45 sources, to which the V/Sc redox sensor cannot be applied, (2) emplaced mid-plate beneath a  
46 thick lithospheric lid allowing only low melt fractions to be achieved, which do not represent  
47 ambient convecting mantle or (3) that assimilated evolved crustal material (Pearce, 2008).

48  
49 For some sample suites, a range of ages is reported, and median age values are used in Figure  
50 1 along with the range as the associated uncertainty. When isochron ages are available,  
51 associated one-sigma uncertainties are plotted. Additional uncertainty (of no consequence to  
52 the conclusions reached in this paper) derives from the fact that in metamorphosed samples,  
53 isochron ages date metamorphism, whereas the protolith could be up to several 100 Ma older  
54 (by analogy with the age of modern ocean basins).

55  
56 Fractionation or accumulation of cpx has a marked effect on V/Sc (Li and Lee, 2004).  
57 Herzberg and Asimow (2008) published equations that define the upper and lower limits of  
58 MgO-CaO relationships that are expected for melts from a dry peridotite source that  
59 experienced only olivine fractionation. These equations were applied to filter samples from  
60 the database that either experienced cpx accumulation (high CaO/MgO) or fractionation (low  
61 CaO/MgO), or that have a pyroxenite component in their source (low CaO/MgO). Data were  
62 filtered to exclude gabbroic (cumulate) samples with positive Eu anomalies; following Li and  
63 Lee (2004), MORB was additionally filtered to exclude samples with MgO < 8 wt%.

## 65 Conversion of V/Sc to $f_{O_2}$

66 The procedure, assumptions and rationale for the conversion of V/Sc to  $f_{O_2}$  have been  
67 described in Aulbach and Viljoen (2015) and are summarised here for the benefit of the  
68 reader; results are given in Table DR2. The main premise of the use of V/Sc as a redox sensor  
69 is that the concentrations of these mildly incompatible elements are little fractionated during  
70 igneous processes (Canil, 1997, 2002; Li and Lee, 2004; Lee et al., 2005). The  $f_{O_2}$  sensitivity  
71 of V has been experimentally demonstrated in numerous studies and the strongest sensitivity  
72 in  $^{bulk}D_V$  is recorded between  $\Delta FMQ-2$  to  $\Delta FMQ+4$  (Mallmann and O'Neill, 2009),  
73 encompassing the region of interest in our study. The V/Sc-derived average  $\Delta FMQ$  of  $-0.3$   
74 and standard deviation of  $\pm 0.5$  for modern MORB (Li and Lee, 2004) compare well in terms  
75 of both absolute value and distribution of values with the value of  $-0.41 \pm 0.43$  obtained from  
76 conventional  $Fe^{3+}/\Sigma Fe$ -based oxybarometry (Frost and McCammon, 2008).

77  
78 Due to higher terrestrial mantle potential temperatures in the past (Davies, 2009), the mantle  
79 solidus was crossed at greater depths, generating higher melt fractions (F). MORB represents  
80 relatively small melt fractions (F  $\sim 0.1$ ) leaving a spinel peridotite source at  $\sim 1.5$  to  $< 2$  GPa  
81 depth and melting on average to 0.5 GPa, whereas picrites represent larger melt fractions (0.2-  
82 0.3) (Herzberg et al., 2010). Bulk  $D_{V/Sc}$  has been shown to change little for F  $\leq 0.27$ , when cpx  
83 is exhausted (Lee et al., 2005). However, with increasing F, incompatible element  
84 concentration ratios in the melt converge, decreasing the sensitivity of V/Sc to  $f_{O_2}$  (Lee et al.,  
85 2005). In order to obtain estimates of F for all samples, the ages for the (meta)basalts are  
86 inverted for  $T_P$  using the  $T_P$  profile of Davies (2009), which then yields a pressure for the

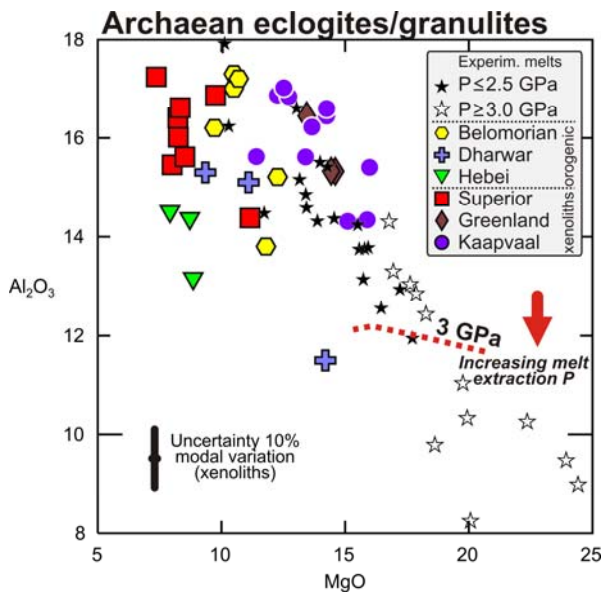

**Figure DR1.**

MgO vs.  $\text{Al}_2\text{O}_3$  content (wt%) in Archaean eclogite and granulite suites encompassing reconstructed (xenoliths) and measured bulk rocks (orogenic), illustrating the pressure-dependence of  $\text{Al}_2\text{O}_3$ . Shown for comparison are peridotite-derived melts experimentally produced at various pressures (Falloon and Green, 1988; Hirose and Kushiro, 1993; Walter, 1998), as well as a melting contour for 3 GPa from the experiments of Walter. This illustrates that Archaean samples formed at low pressures of melt extraction in the absence of garnet, implying melting in the spinel peridotite field and moderate melt fractions ( $<0.3$ ) in accord with their picritic compositions.

onset of partial melting for each of the suites when combined with the solidus parameterisation of Hirschmann (2000) (Table DR2). For this  $T_P$  profile at 3 Ga, the solidus is crossed at a pressure of 2.5 GPa when the mantle  $T_P$  is  $\sim 1420^\circ\text{C}$ , consistent with the absence of a garnet signature during formation of the low-pressure protoliths to Archaean eclogite suites (Figure DR1). For mantle upwelling beneath mid-ocean ridges, the final melting pressure is likely shallow in the absence of a pre-existing lithospheric lid, ranging from 1 atm to 1 GPa, such that the melt fraction  $F$  should be proportional to the depth of onset of partial melting and the resulting length of the melting column (Herzberg et al., 2010). Finally,  $V/\text{Sc}$  is converted to  $\Delta\text{FMQ}$  as a function of  $F$ , using the relationship derived by Li and Lee (2004).

The mantle becomes more reducing with depth (Frost and McCammon, 2008), owing to the enhanced stability of ferric iron-bearing components in garnet and pyroxene, and, in the modern mantle, reaches metal saturation at depths around 250-300 km (Ballhaus, 1995; Rohrbach et al., 2007). A meaningful comparison of the redox state of mantle-derived melts must take into account that these may have separated from a source at variable mantle depths, depending on mantle potential temperature ( $T_P$ ) as a function of age. This pressure effect is corrected by projecting from the average depth of melting for the generation of the protoliths to the samples used in this study to the average depth of MORB generation, assumed here to be 1 GPa (Foley, 2011). Using a final melting pressure of 0.5 GPa and a melt productivity of 10% per GPa (Walter, 1999), the average melt extraction pressure is calculated from the melt fraction described in the previous paragraph (Table 1). A correction to 1 GPa can then be made using the  $\Delta\text{FMQ}$ -depth relationship of Stagno et al. (2013), with a value of 0.4 log units per GPa. If the final melting pressure was higher, for example 1 GPa instead of 0.5 GPa, the corresponding  $\Delta\text{FMQ}$  correcting to 1 GPa would increase by 0.10 log units.

## Uncertainties

The application of  $V/\text{Sc}$  as a redox proxy and conversion to oxygen fugacity has been modelled by Li and Lee (2004) assuming a primitive mantle (PM) source and isobaric non-modal batch melting in the spinel peridotite stability field, but an uncertainty estimate is not provided. Several uncertainties can be identified: (1) Related to source compositions and

**Figure DR2.**

Series of bivariate diagrams (oxides in wt%, trace elements in ppm) used to assess the low-pressure origin and metamorphic evolution of diverse (meta)basalt suites used in this study. A-D: Archaean suites; E-H: Proterozoic suites; references in Table DR1. Shown for comparison is the MORB compilation of Jenner and O'Neill (2012). Lower average concentrations in incompatible minor and trace elements ( $\text{TiO}_2$ , Ce, Yb) indicate formation at higher melt fractions, whereas positive trends of Ce and Yb with  $\text{TiO}_2$  indicate melt evolution during fractional crystallisation of olivine ( $\pm$  plagioclase), where these elements are incompatible. Lower slopes of  $\text{TiO}_2$  with Ce compared to basalts and picrites may indicate metamorphic melt loss of highly incompatible Ce; similar slopes of  $\text{TiO}_2$  with Yb to MORB suggests derivation by partial melting of spinel peridotite, whereas lower slopes may indicate retention of Yb by garnet in the source, hence partial melting at pressures  $\geq 2.5$ -3.0 GPa; higher slopes may be due to metamorphic melt loss in the eclogite facies, during which Yb is compatible in garnet (Aulbach and Viljoen, 2015). Bottom panels show V/Sc against Sc to assess effects of degree of peridotite source melting and against chondrite-normalised Ce/Yb (denoted by subscript  $_N$ ) as a proxy for degree of eclogite partial melting during metamorphism. There appears to be a trend for Proterozoic samples, indicating that V behaved more incompatibly, as modelled for melting of rutile eclogite with NMORB composition at  $\Delta\text{FMQ}+0.5$  (Table DR4). A significant number of Archaean samples falls above and below the modelled melt depletion trend and shows no covariation of V/Sc as a function of  $\text{Ce/Yb}_N$ .

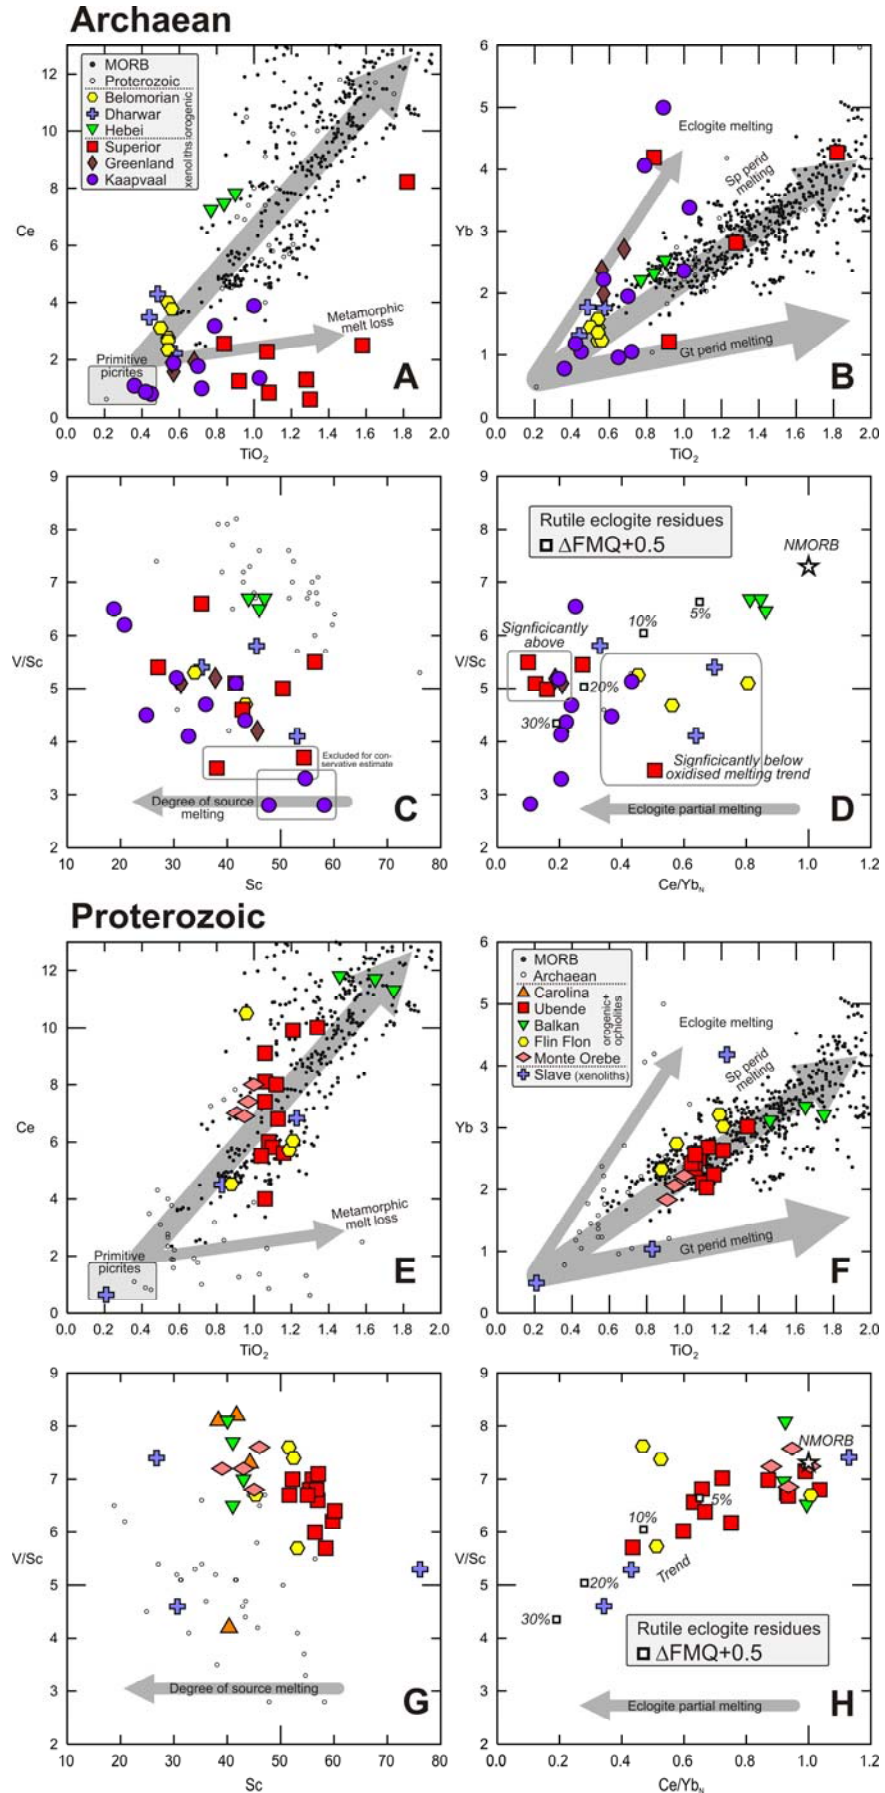

mineralogy diverging from the primitive mantle model. This is further discussed in section 4 below. (2) Uncertainty in the garnet-cpx modal abundances used in the reconstruction of mantle eclogites. The average  $^{cpx/garnet} D_V$  and  $D_{Sc}$  is 3.0 and 0.27, respectively, in a suite of mantle eclogites from the Lace kimberlite (Kaapvaal craton), indicating stronger partitioning of V into cpx and of Sc into garnet, and a sensitivity of bulk rock V/Sc on mineral modes. The effect of varying the mineral mode by 10% (e.g. 60% garnet plus 40% cpx instead of equal proportions) on V/Sc is to vary this ratio on average by 1 “unit” (Aulbach and Viljoen, 2015). Unless a systematic bias is involved, this is of no consequence when average values are calculated for multiple samples per eclogite suite, as done here. (3) Within-suite spread of V/Sc values, which translate into large standard deviations as shown in Fig. 1. The modern MORB source is known to be heterogeneous with regard to mineralogy and composition (e.g. Salters and Stracke 2004) and to redox state (Cottrell and Kelley 2013). The ancient uppermost convecting mantle may have been similarly heterogeneous, giving rise to a similar spread in V/Sc. This translates into heterogeneity with regard to elemental V and Sc concentrations in the source, but also to the partitioning of V into the melt as a function of  $f_{O_2}$ .

### 3. ASSESSMENT OF INTER-LABORATORY BIAS

For the reported measured bulk rock compositions (orogenic and ophiolitic amphibolites, granulites and eclogites), most data were produced by XRF or solution ICPMS. Noack et al. (2013) present Sc results obtained by solution ICPMS on BHVO-2 (31.3 ppm) and BIR-1 (42.7 ppm), compared with GEOREM-values of 33 and 43 ppm, respectively, revealing minimal deviation. Reference values for V are not available in that study. Errors <5% are cited for solution ICPMS-derived trace-element data from the Belomorian belt (Shchipansky et al., 2012). Inter-lab comparison of rocks with matrices similar to the (meta)basalts used here (dolerite and microgabbro) demonstrate that XRF data for both V and Sc agree to within 8 and 7% (1 sigma), respectively (Govindaraju et al., 1994). Good agreement with accepted values (<7% deviation, both positive and negative) was obtained for Sc in three well-characterised basaltic reference materials (BCR-1, BHVO-1, BIR) using ICPMS (Garbeschoenberg et al., 1993; V was not quantified in that study), corresponding to techniques employed in the studies used here.

For eclogite xenoliths, bulk rock compositions are based on in situ analyses of constituent garnet and cpx, employing EPMA and LAM ICPMS, which are routine analyses in the labs from which such data are used (University of Alberta, Frankfurt University, Macquarie University; first author has worked in all three laboratories). V and Sc occur in both minerals at concentrations far above the limit of detection (<0.06 ppm and <0.3 ppm, respectively) and can be determined with instrumental uncertainties of ~5% (Aulbach and Viljoen, 2015). From an analytical viewpoint, there is therefore no concern that V/Sc could be systematically underestimated. Three Archaean mantle eclogite suites (Greenland/North Atlantic craton: Tappe et al., 2011; Superior: Smit et al., 2014; Kaapvaal: Aulbach and Viljoen, 2015), give lower V/Sc values than Proterozoic suites, which agree remarkably well with V/Sc for two similarly aged orogenic eclogites and granulites (Shchipansky et al., 2012; Noack et al., 2013), the V/Sc of which was obtained using whole-rock analytical techniques in other laboratories (Table DR3). These considerations provide circumstantial evidence that inter-laboratory bias or a bias from rock type (measured orogenic vs. reconstructed xenolith) is small.

#### 4. EFFECTS OF MANTLE SOURCE MINERALOGY

A secular change in the modal composition of the ambient convecting mantle has plausibly occurred by progressive depletion of an originally primitive “starting material” due to extraction of the continental crust (corresponding to an  $F$  of 0.03; Workman and Hart, 2005). Modelling presented in Table DR4 shows that melting of (1) depleted rather than primitive mantle, (2) pyroxene-rich source heterogeneities or (3) garnet rather than spinel peridotite will lead to higher  $V/Sc$  in the melt compared to a primitive mantle model, hence biasing the results towards higher apparent  $f_{O_2}$  when the Li and Lee (2004) model is used as a redox proxy.

#### 5. EFFECT OF PARTIAL MELT LOSS DURING OR AFTER ECLOGITISATION

The effect of metamorphic melt loss, during or after eclogitisation of warm Archaean oceanic crust where a silicic melt similar to tonalite-trondhjemite-granodiorite is produced (e.g. Sen and Dunn, 1994), is gauged using chondrite-normalised  $Ce/Yb$  (denoted with subscript  $N$ ). Modelling shows that this ratio decreases to 0.65 after 5% and 0.28 after 20% partial melt extraction from a rutile-bearing eclogite (Aulbach and Viljoen, 2015). Archaean sample suites show no co-variation of  $V/Sc$  with  $Ce/Yb_N$ , indicating that the effect of melt extraction on  $V/Sc$  is insignificant, whereas post-Archaean suites appear to show a correlation (Figure DR2D, H).

Fully quantitative modelling of the effect of melt loss from eclogite is hampered by the lack of experimental partitioning data for  $D_V^{Mineral-silicic\ melt}$  and knowledge of how the  $f_{O_2}$  in subducting oceanic crust changes with depth. Preliminary modelling using coefficients for the redox-dependent distribution of  $V$  between basaltic melt and cpx plus garnet ( $D_V^{garnet} = D_V^{cpx}$ ; Mallmann and O'Neill, 2009), and assuming that  $D_V^{rutile}$  changes as a function of  $f_{O_2}$  at the same rate as cpx (Table DR4), shows that under reducing conditions ( $\Delta FMQ-2$ ), bulk  $D_{V/Sc}$  is 0.73, whereas under more oxidising conditions ( $\Delta FMQ-0.4$ , corresponding to the modern MORB source) bulk  $D_{V/Sc}$  is 0.28. For oxidising conditions, this leads to a decrease in  $V/Sc$  from 7.29 to 6.26 (NMORB estimate of Gale et al., 2013), whereas for more reducing conditions a weaker decrease is observed (to 7.13, both for  $F = 0.2$ ). For an Archaean basalt with lower initial  $V/Sc$  of 5.50, the decrease upon melt extraction from eclogite would be smaller still (to 5.38). While the  $V/Sc$  of Proterozoic suites is well modelled for a  $\Delta FMQ+0.5$  (plausibly corresponding to more oxidising conditions in subduction zones after the GOE), a significant number of Archaean samples lies below and above the trend at moderate and high degrees of melt extraction, respectively, suggesting partial melt extraction under reducing conditions when  $V/Sc$  changes little (Figure DR2D, H).

At least some of the lowest  $V/Sc$  values are observed for low  $Ce/Yb_N$  and these samples are excluded for a conservative estimate in order to avoid a bias toward low  $f_{O_2}$ , although these low  $V/Sc$  are unlikely to be due to melt loss from eclogite. Conversely, inclusion of Proterozoic samples with low  $V/Sc$  at low  $Ce/Yb_N$  may imply a small bias of the data toward lower  $f_{O_2}$ . Their exclusion would drive the average Post-Archaean data towards an even higher average, accentuating the difference with the Archaean data-set. Our approach is to err on the side of overestimating  $f_{O_2}$  in the Archaean and underestimating  $f_{O_2}$  in the post-Archaean. The fact that we still observe a resolvable difference (at the 2 sigma level) between both, after accounting for the higher melt fractions and deeper onset of partial melting leading

to the generation of Archaean picrites, suggests that the differences between the two data-sets are real and related to redox.

## 6. ESTIMATE OF CO<sub>2</sub> FLUX DURING THE MESOARCHEAN

It is possible to determine the asthenospheric redox profile based on the use of oxybarometry for garnet-bearing peridotite for known  $f_{O_2}$  of MORB (Stagno et al., 2013). At depths where the  $f_{O_2}$ , buffered by the 4-phase mantle mineral assemblage, crosses the boundary at which carbon and carbonate coexist, redox melting is expected to occur above the solidus temperatures of carbonated peridotite. At higher Archaean mantle potential temperatures and lower  $f_{O_2}$  determined in this study (Table DR2), and following the parameterization of melt fraction vs T (Dasgupta, 2013) and of  $X_{CO_2}$  (melt) vs  $f_{O_2}$  (Stagno and Frost, 2010), the resulting melt composition is carbonate-silicate. The oxygen needed to oxidise graphite to carbonate causes a shift in the  $Fe^{3+}/\Sigma Fe$  of the mantle bulk composition, which depends on the initial carbon concentration. In this study, the carbon concentration is chosen to be in agreement with experiments on C partitioning between silicate and melts (Dasgupta, 2013).

## REFERENCES FOR DATA REPOSITORY

- Aulbach, S., Pearson, N.J., O'Reilly, S.Y., and Doyle, B.J., 2007, Origins of xenolithic eclogites and pyroxenites from the central slave craton, Canada: *Journal of Petrology* 48, 1843-1873.
- Aulbach, S., O'Reilly, S.Y., and Pearson, N.J., 2011, Constraints from eclogite and MARID xenoliths on origins of mantle Zr/Hf-Nb-Ta variability: *Contributions to Mineralogy and Petrology*, v. 162, p. 1047-1062.
- Ballhaus, C., 1995. Is the upper mantle metal-saturated?: *Earth and Planetary Science Letters*, v. 132, p. 75-86.
- Barth, M.G., Foley, S.F., and Horn, I., 2002a, Partial melting in Archean subduction zones: constraints from experimentally determined trace element partition coefficients between eclogitic minerals and tonalitic melts under upper mantle conditions: *Precambrian Research*, v. 113, p. 323-340.
- Bickle, M.J., Nisbet, E.G., and Martin, A., 1994, Archaean greenstone belts are not oceanic crust: *Journal of Geology*, v. 102, p. 121-138.
- Boniface, N., Schenk, V., and Appel, P., 2012, Paleoproterozoic eclogites of MORB-type chemistry and three Proterozoic orogenic cycles in the Ubendian Belt (Tanzania): Evidence from monazite and zircon geochronology, and geochemistry. *Precambrian Research*, v. 192-95, p. 16-33.
- Caxito, F., Uhlein, A., Stevenson, R., and Uhlein, G.J., 2014. Neoproterozoic oceanic crust remnants in northeast Brazil: *Geology*, v. 42, p. 387-390.
- Davis, F.A., Humayun, M., Hirschmann, M.M., and Cooper R.S., 2013, Experimentally determined mineral/melt partitioning of first-row transition elements (FRTE) during partial melting of peridotite at 3 GPa: *Geochimica Et Cosmochimica Acta*, v. 104, p. 232-260.
- Falloon, T.J., and Green, D.H., 1988, Anhydrous Partial Melting of Peridotite from 8 to 35 kb and the Petrogenesis of MORB. *Journal of Petrology Special Lithosphere Issue*, p. 379-414.
- Foley, S.F., Barth, M.G., and Jenner, G.A., 2000, Rutile/melt partition coefficients for trace elements and an assessment of the influence of rutile on the trace element characteristics of subduction zone magmas: *Geochimica Et Cosmochimica Acta*, v. 64, p. 933-938.
- Gale, A., Dalton, C.A., Langmuir, C.H., Su, Y.J., and Schilling, J.G., 2013, The mean composition of ocean ridge basalts: *Geochemistry Geophysics Geosystems*, v. 14, p. 489-518.
- Garbe-Schoenberg, C.-D., 1993, Simultaneous Determination of Thirty-Seven Trace Elements in Twenty-Eight International Rock Standards by ICP-MS: *Geostandards Newsletter*, v. 17, p. 81-97.



- Govindaraju, K., Potts, P.J., Webb, P.C., and Watson J.S., 1994, 1994 Report on Whin Sill dolerite WS-E from England and Pitscurrie microgabbro PM-S from Scotland – assessment by 104 international laboratories: *Geostandards Newsletter*, v. 18, p. 211-300.
- Guo, R., Liu, S., Santosh, M., Li, Q., Bai, X., and Wang, W., 2013, Geochemistry, zircon U-Pb geochronology and Lu-Hf isotopes of metavolcanics from eastern Hebei reveal Neoproterozoic subduction tectonics in the North China Craton. *Gondwana Research* 24, p. 664-686.
- Herzberg, C., Condie, K., and Korenaga, J., 2010, Thermal history of the Earth and its petrological expression: *Earth and Planetary Science Letters*, v. 292, 79-88.
- Hirose, K., and Kushiro, I., 1993, Partial melting of dry peridotites at high pressure - determination of compositions of melts segregated from peridotite using aggregates of diamond. *Earth and Planetary Science Letters*, v. 114, p. 477-489.
- Jacob, D.E., 2004, Nature and origin of eclogite xenoliths from kimberlites. *Lithos* 77, p. 295-316.
- Jenner, F.E., and O'Neill, H.S., 2012, Analysis of 60 elements in 616 ocean floor basaltic glasses: *Geochemistry Geophysics Geosystems*, v. 13.
- Kamber, B.S., 2015, The evolving nature of terrestrial crust from the Hadean, through the Archean, into the Proterozoic: *Precambrian Research*, v. 258, p. 48-82.
- Lambart, S., Laporte, D., Provost, A., and Schiano, P., 2012, Fate of Pyroxenite-derived Melts in the Peridotitic Mantle: Thermodynamic and Experimental Constraints: *Journal of Petrology*, v. 53, p. 451-476.
- McDonough, W.F., and Sun, S.S., 1995, The composition of the Earth: *Chemical Geology*, v. 120, p. 223-253.
- Noack, N.M., Kleinschrodt, R., Kirchenbaur, M., Fonseca, R.O.C., and Muenker, C., 2013, Lu-Hf isotope evidence for Neoproterozoic metamorphism and deformation of Archean oceanic crust along the Dharwar Craton margin, southern India: *Precambrian Research*, v. 233, p. 206-222.
- Rohrbach, A., Ballhaus, C., Golla-Schindler, U., Ulmer, P., Kamenetsky, V.S., and Kuzmin, D.V., 2007, Metal saturation in the upper mantle: *Nature*, v. 449, p. 456-458.
- Salter, V.J.M., and Stracke, A., 2004. Composition of the depleted mantle: *Geochemistry Geophysics Geosystems*, v. 5.
- Savov, I., Ryan, J., Haydoutov, I., and Schijf, J., 2001, Late Precambrian Balkan-Carpathian ophiolite - a slice of the Pan-African ocean crust?: geochemical and tectonic insights from the Tcherni Vrah and Deli Jovan massifs, Bulgaria and Serbia: *Journal of Volcanology and Geothermal Research*, v. 110, p. 299-318.
- Sen, C., and Dunn, T., 1994, Dehydration melting of a basaltic composition amphibole at 1.5 and 2.0 GPa - implications for the origin of adakites. *Contributions to Mineralogy and Petrology*, v. 117, p. 394-409.
- Shchipansky, A.A., Khodrevskaya, L.I., and Slabunov, A.I., 2012, The geochemistry and isotopic age of eclogites from the Belomorian Belt (Kola Peninsula): evidence for subducted Archean oceanic crust: *Russian Geology and Geophysics*, v. 53, p. 262-280.
- Shervais, J.W., Dennis, A.J., McGee, J.J., and Secor, D., 2003, Deep in the heart of Dixie: Pre-Alleghanian eclogite and HP granulite metamorphism in the Carolina terrane, South Carolina, USA: *Journal of Metamorphic Geology*, v. 21, p. 65-80.
- Smart, K.A., Chacko, T., Simonetti, A., Sharp, Z.D., and Heaman, L.M., 2014, A Record of Neoproterozoic Subduction Preserved in the Northern Slave Cratonic Mantle: Sr-Pb-O Isotope and Trace-element Investigations of Eclogite Xenoliths from the Jericho and Muscox Kimberlites: *Journal of Petrology*, v. 55, p. 549-583.
- Smit, K.V., Stachel, T., Creaser, R.A., Ickert, R.B., DuFrane, S.A., Stern, R.A., and Seller, M., 2014, Origin of eclogite and pyroxenite xenoliths from the Victor kimberlite, Canada, and implications for Superior craton formation: *Geochimica Et Cosmochimica Acta*, v. 125, p. 308-337.
- Stern, R.A., Syme, E.C., and Lucas, S.B., 1995. Geochemistry of 1.9 Ga MORB-like and OIB-like basalts from the Amisk collage, Flin-Flonbelt, Canada - evidence for an intraoceanic origin:



308      *Geochimica Et Cosmochimica Acta*, v. 59, p. 3131-3154.  
 309      Tappe, S., Smart, K.A., Pearson, D.G., Steenfelt, A., and Simonetti, A., 2011, Craton formation in  
 310      Late Archean subduction zones revealed by first Greenland eclogites: *Geology*, v. 39, p. 1103-1106.  
 311      Walter, M.J., 1998, Melting of garnet peridotite and the origin of komatiite and depleted lithosphere.  
 312      *Journal of Petrology*, v. 39, p. 29-60.  
 313      Walter, M.J., 1999, Melting residues of fertile peridotite and the origin of cratonic lithosphere, in:  
 314      Fei, Y., Bertka, C.M., and Mysen, B.O. (Eds.), *Mantle Petrology: Field Observations and High-*  
 315      *pressure Experimentation: a Tribute to Francis R. (Joe) Boyd*. Geochemical Society, Special  
 316      Publications, pp. 225-239.  
 317      Workman, R.K., and Hart, S.R., 2005, Major and trace element composition of the depleted MORB  
 318      mantle (DMM): *Earth and Planetary Science Letters*, v. 231, p. 53-72.
